# Supplementary material for: Wavelength Dependence of the Transformation Mechanism of Sulfonamides Using Different LED Light Sources and TiO2 and ZnO Photocatalysts
Source: MDPI journal article supplement (doi:10.3390/ma15010049), 2021-12-22
Supplement: s1 [file s1]

## Supplementary materials

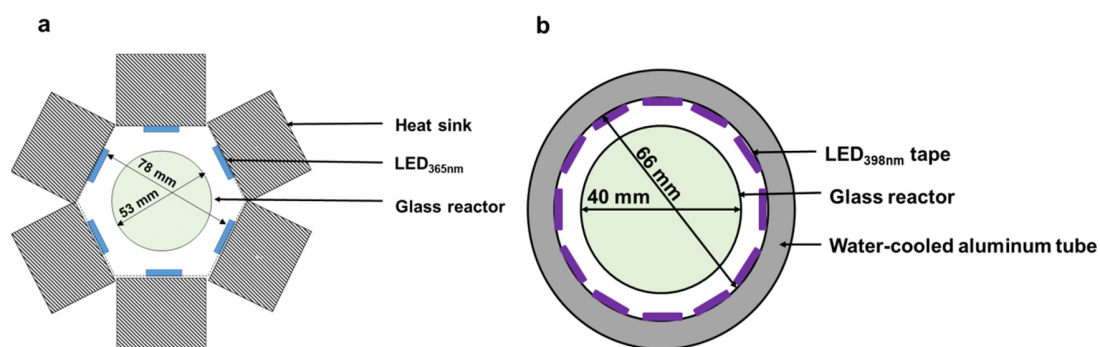

**Figure S1.** The schematic figure of the photoreactors ((a): LED<sub>365nm</sub>, (b): LED<sub>398nm</sub>)

**Table S1.** The list of used chemicals, their distributors and purity

| Chemical                                                            | Distributor                                | Purity               |
|---------------------------------------------------------------------|--------------------------------------------|----------------------|
| COU                                                                 | Sigma Aldrich (St.Louis, Missouri, USA)    | 99%                  |
| 1,4-BQ                                                              | Acros Organics (Geel, Belgium)             | 99%                  |
| SMT                                                                 | Sigma Aldrich (St.Louis, Missouri, USA)    | 99%                  |
| SMP                                                                 | Fluka (Buchs, Switzerland)                 | 99%                  |
| NaCl                                                                | VWR (Radnor, Pennsylvania, USA)            | 99%                  |
| NaHCO <sub>3</sub>                                                  | VWR (Radnor, USA)                          | 99%                  |
| HCl                                                                 | Sigma Aldrich (St.Louis, Missouri, USA)    | 98%                  |
| NaOH                                                                | VWR (Radnor, Pennsylvania, USA)            | 99%                  |
| Catalase (bovine liver)                                             | Sigma Aldrich (St.Louis, Missouri, USA)    | >55% protein content |
| Fe <sub>2</sub> (SO <sub>4</sub> ) <sub>3</sub> × nH <sub>2</sub> O | VWR (Radnor, Pennsylvania, USA)            | 98%                  |
| K <sub>2</sub> C <sub>2</sub> O <sub>4</sub>                        | Reanal (Budapest, Hungary)                 | 98%                  |
| 1,4-phenantroline                                                   | Sigma Aldrich (St.Louis, Missouri, USA)    | 99%                  |
| N <sub>2</sub>                                                      | Messer Hungary (Budapest, Hungary)         | 99.995%              |
| Synthetic air                                                       | Messer Hungary (Budapest, Hungary)         | Medical grade        |
| Formic acid                                                         | VWR (Radnor, Pennsylvania, USA)            | 100%                 |
| MeOH                                                                | VWR (Radnor, Pennsylvania, USA)            | 99.8%                |
| H <sub>2</sub> O                                                    | Merck-Millipore (Burlington, Vermont, USA) | ultrapure            |

**Table S2.** The measured, relevant parameters of the real water matrices

| Parameter                                              | Tap water | Biologically treated domestic wastewater |
|--------------------------------------------------------|-----------|------------------------------------------|
| pH                                                     | 7.4       | 7.8                                      |
| Conductivity (μS cm <sup>-1</sup> )                    | 627       | 1258                                     |
| COD (mg dm <sup>-3</sup> )                             | 4.2       | 24.4                                     |
| NH <sub>4</sub> <sup>+</sup> -N (mg dm <sup>-3</sup> ) | <0.4      | <0.4                                     |
| NO <sub>3</sub> <sup>-</sup> (mg dm <sup>-3</sup> )    | <0.7      | 3.37                                     |
| Cl <sup>-</sup> (mg dm <sup>-3</sup> )                 | 8.75      | 120                                      |
| TOC <sup>1</sup> (mg dm <sup>-3</sup> )                | 0.79      | 6.9                                      |
| TIC <sup>2</sup> (mg dm <sup>-3</sup> )                | 73.4      | 103.4                                    |

<sup>1</sup> Total Organic Carbon

<sup>2</sup> Total Inorganic Carbon, the sum of dissolved CO<sub>2</sub>, HCO<sub>3</sub><sup>-</sup> and CO<sub>3</sub><sup>2-</sup>

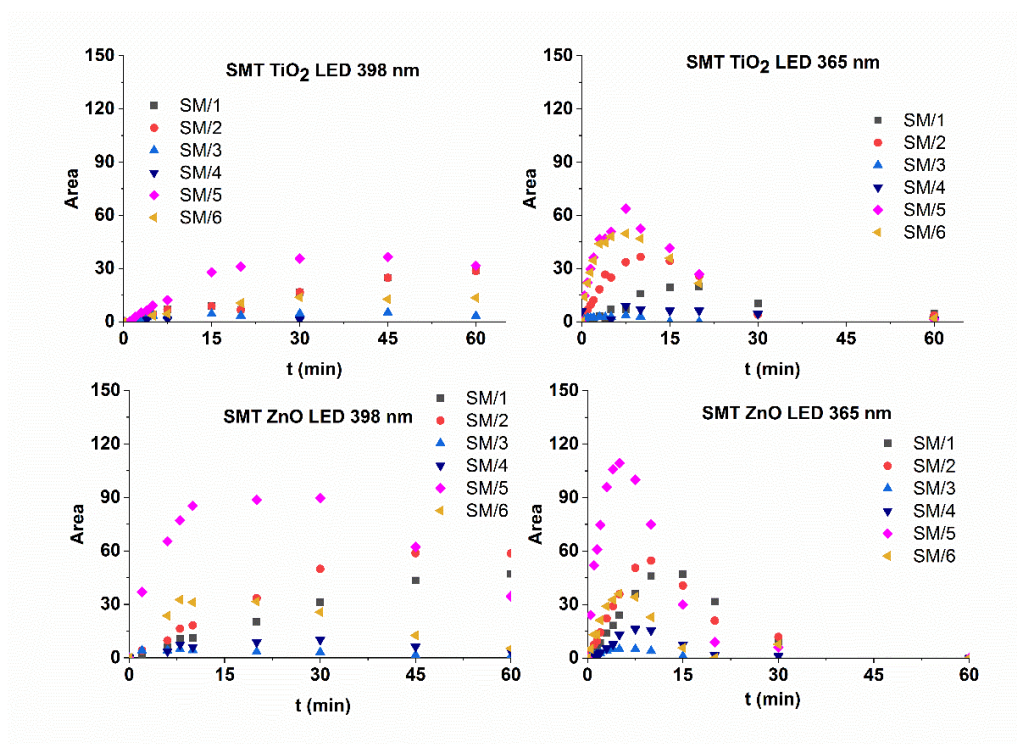

**Figure S2.** The peak area (HPLC-DAD) of the products of SMT transformation as a function of irradiation time

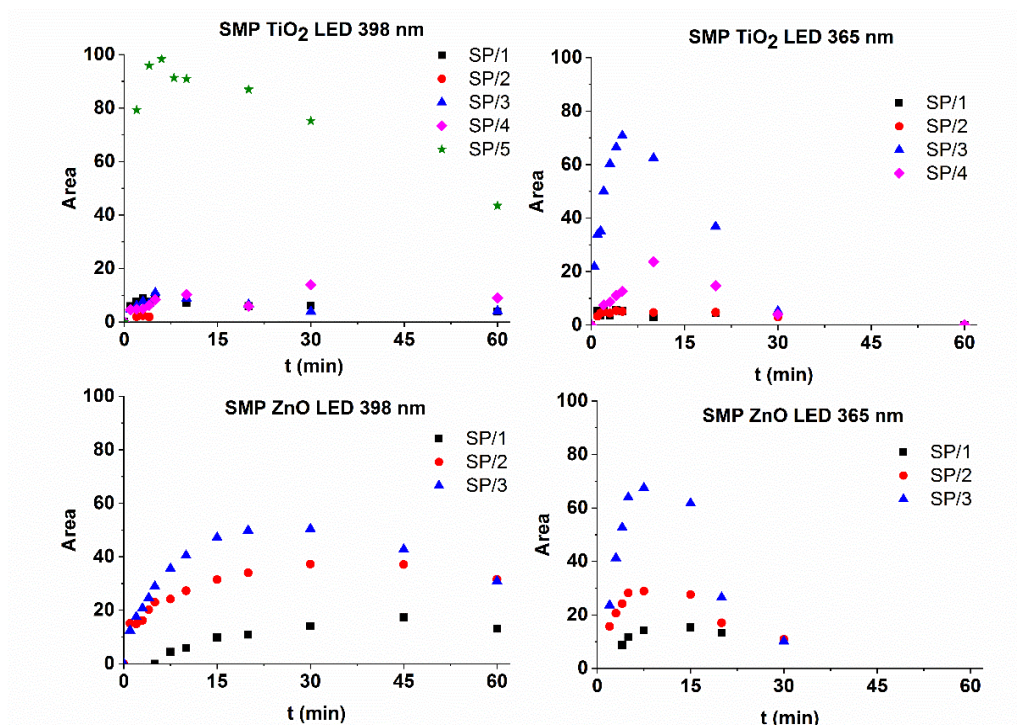

**Figure S3.** The peak area (HPLC-DAD) of the products of SMP transformation as a function of irradiation time

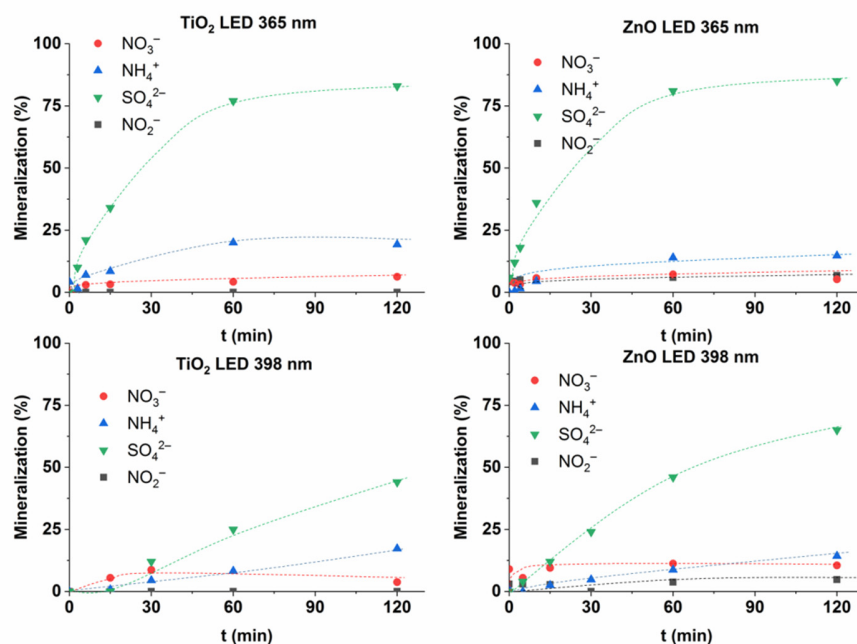

**Figure S4.** The transformation of organic nitrogen and sulfur to inorganic ions during the photocatalytic removal of SMT (Mineralization(%) = concentration of given ion divided by the organic N-content or S-content of the starting solution)

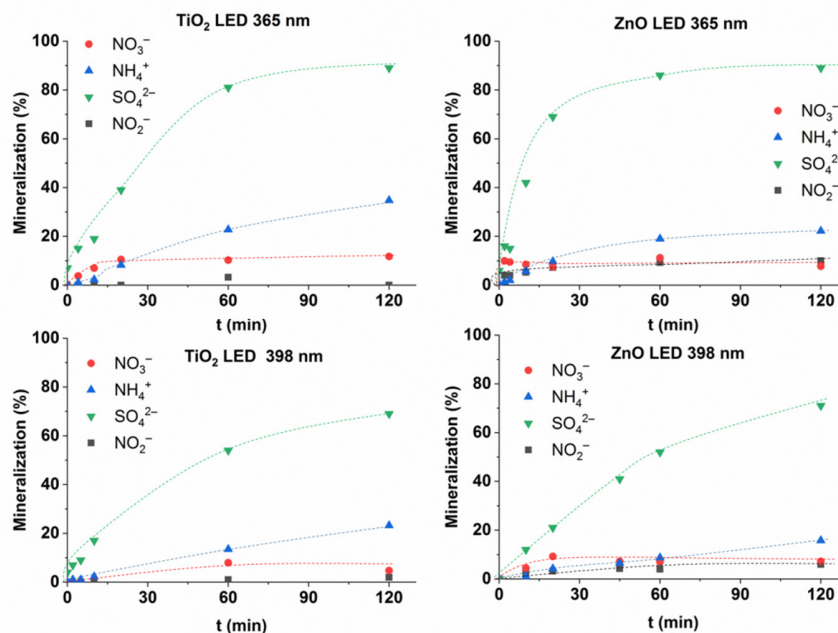

**Figure S5.** The transformation of organic nitrogen and sulfur to inorganic ions during the photocatalytic removal of SMP (Mineralization(%) = concentration of given ion divided by the organic N-content or S-content of the starting solution)
